# Supplementary material for: High-efficiency catalytic wet air oxidation of high salinity phenolic wastewater under atmospheric pressure in molten salt hydrate media
Source: Royal Society of Chemistry journal article supplement (doi:10.1039/d0nj05271j), 2020-12-24
Supplement: d0nj05271j1.pdf [file d0nj05271j1.pdf]

Supporting Information of

**High-Efficiency Catalytic Wet Air Oxidation of High Salinity  
Phenolic Wastewater under Atmosphere Pressure in Molten  
Salt Hydrates Media**

Hongzi Tan <sup>#</sup>, Shuai Wang <sup>#</sup>, Jinghua Wang, Feng Song, Xiuyu Sun, Rongrong Zhao, Yuan Zhang  
and Hongyou Cui <sup>\*</sup>

*School of Chemistry & Chemical Engineering, Shandong University of Technology, Zibo, Shandong  
255049, P. R. China.*

<sup>#</sup> *These two authors contributed equally.*

<sup>\*</sup>*To whom correspondence should be addressed: E-mail: [cuihy@sdut.edu.cn](mailto:cuihy@sdut.edu.cn)*

Table S1. The theoretical desalination efficiency of NaCl with the introduction of anhydrous CaCl<sub>2</sub>.

| Temperature (°C)                                                  | 0      | 10     | 20      | 30      | 40      | 50      | 60      | 70      | 80      | 90       | 100      |
|-------------------------------------------------------------------|--------|--------|---------|---------|---------|---------|---------|---------|---------|----------|----------|
| NaCl solubility (g/100 mL H <sub>2</sub> O)                       | 35.70  | 35.80  | 36.00   | 36.30   | 36.60   | 37.00   | 37.30   | 37.80   | 38.40   | 39.00    | 39.80    |
| NaCl concentration (mol·L <sup>-1</sup> )                         | 6.10   | 6.12   | 6.15    | 6.21    | 6.26    | 6.32    | 6.38    | 6.46    | 6.56    | 6.67     | 6.80     |
| $K_{sp}$ of NaCl                                                  | 37.24  | 37.45  | 37.87   | 38.50   | 39.14   | 40.00   | 40.65   | 41.75   | 43.09   | 44.44    | 46.29    |
| CaCl <sub>2</sub> solubility (g/100 mL H <sub>2</sub> O)          | 59.50  | 64.70  | 74.50   | 100.00  | 128.00  | 132.00  | 137.00  | 143.00  | 147.00  | 154.00   | 159.00   |
| CaCl <sub>2</sub> concentration (mol·L <sup>-1</sup> )            | 5.36   | 5.83   | 6.71    | 9.01    | 11.53   | 11.89   | 12.34   | 12.88   | 13.24   | 13.87    | 14.32    |
| $K_{sp}$ of CaCl <sub>2</sub>                                     | 616.09 | 792.14 | 1209.37 | 2924.77 | 6133.68 | 6726.87 | 7520.60 | 8552.62 | 9290.58 | 10682.02 | 11756.62 |
| In the mixed CaCl <sub>2</sub> -NaCl solution                     |        |        |         |         |         |         |         |         |         |          |          |
| Maximum concentration of CaCl <sub>2</sub> (mol·L <sup>-1</sup> ) | 4.37   | 4.89   | 5.86    | 8.34    | 10.99   | 11.35   | 11.81   | 12.36   | 12.72   | 13.36    | 13.80    |
| Maximum concentration of NaCl (mol·L <sup>-1</sup> )              | 3.14   | 2.94   | 2.64    | 2.06    | 1.66    | 1.64    | 1.61    | 1.59    | 1.59    | 1.57     | 1.59     |
| CaCl <sub>2</sub> ion product                                     | 616.09 | 792.13 | 1209.36 | 2924.74 | 6133.59 | 6726.77 | 7520.55 | 8552.55 | 9290.45 | 10681.91 | 11756.51 |
| Ratio of ion product to $K_{sp}$ of CaCl <sub>2</sub>             | ≤1     | ≤1     | ≤1      | ≤1      | ≤1      | ≤1      | ≤1      | ≤1      | ≤1      | ≤1       | ≤1       |
| Desalination efficiency (%)                                       | 48.61  | 51.91  | 57.15   | 66.87   | 73.52   | 74.02   | 74.73   | 75.44   | 75.71   | 76.43    | 76.62    |



## Theoretical maximum desalination efficiency of NaCl at 100 °C

$$C_{\text{NaCl, saturation}}=6.80 \text{ mol}\cdot\text{L}^{-1}, C_{\text{CaCl}_2, \text{ saturation}}=14.32 \text{ mol}\cdot\text{L}^{-1}$$

$$K_{\text{sp, NaCl}}=[\text{Na}^+]\times[\text{Cl}^-]=46.29, K_{\text{sp, CaCl}_2}=[\text{Ca}^{2+}]\times[\text{Cl}^-]^2=11756.62$$

When anhydrous  $\text{CaCl}_2$  is introduced into a saturated  $\text{NaCl}$  solution, the solubility of  $\text{NaCl}$  in the mixed solution would decline owing to the common-ion effect, and the residual  $\text{NaCl}$  concentration could be calculated based on the amount of  $\text{CaCl}_2$  added. Before ion product of  $\text{CaCl}_2$  reaches up to the maximum ( $K_{\text{sp, CaCl}_2}$ ), the introduced  $\text{CaCl}_2$  could dissolve completely. As the ion product of  $\text{NaCl}$  ( $K_{\text{sp, NaCl}}$ ) is smaller than that of  $\text{CaCl}_2$ , part of the  $\text{NaCl}$  will be salted out so that the ion product of dissolved  $\text{NaCl}$  equals to  $K_{\text{sp, NaCl}}$ . Based on this assumption, the maximum desalination efficiency of  $\text{NaCl}$  can be calculated. By calculation, the maximum  $\text{CaCl}_2$  concentration was about  $13.80 \text{ mol}\cdot\text{L}^{-1}$ , and the residual  $\text{NaCl}$  concentration was  $1.59 \text{ mol}\cdot\text{L}^{-1}$ , which is corresponding to a maximum desalination efficiency of 76.62% of  $\text{NaCl}$ . The detailed calculation is shown as follows.

Assuming that the residual  $\text{NaCl}$  concentration is  $x \text{ mol}\cdot\text{L}^{-1}$  when the maximum  $\text{Ca}^{2+}$  concentration reaches to  $13.80 \text{ mol}\cdot\text{L}^{-1}$ , then the following relation remains at equilibrium state at  $100^\circ\text{C}$ .

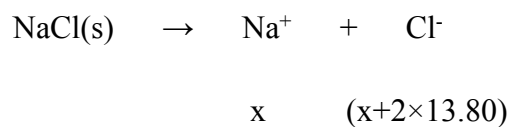

$$x\times(x+2\times 13.80)=46.29 \quad \text{Eq. (1)}$$

where 46.29 is the  $K_{\text{sp, NaCl}}$  at  $100^\circ\text{C}$ .

It turns out from *Eq. (1)* that  $x=1.59 \text{ mol}\cdot\text{L}^{-1}$ , and the desalination efficiency of  $\text{NaCl}$  is calculated as 76.62%  $[(6.80-1.59)/6.80\times 100\%=76.62\%]$ . Therefore, the theoretical maximum desalination efficiency of  $\text{NaCl}$  at  $100^\circ\text{C}$  is 76.62%.

## **Experimental verification of maximum desalination efficiency of NaCl at different temperature**

In order to verify the maximum desalination efficiency, anhydrous  $\text{CaCl}_2$  was introduced into the saturated NaCl solution at different temperature to salt out the dissolved NaCl (Table S2). Taking the desalination process at 100 °C as an example, a saturated NaCl solution was firstly prepared by dissolving 39.8 g NaCl into 100 mL  $\text{H}_2\text{O}$ . Then, slightly excessive anhydrous  $\text{CaCl}_2$  was added. With the introduction of  $\text{CaCl}_2$ , a portion of dissolved NaCl was salted out gradually. After centrifuge, the salted-out NaCl as well as the undissolved  $\text{CaCl}_2$  was collected, dried and weighted (about 31.47 g). Then, taking the mixture into a conical flask, sufficient water was added to completely dissolve the mixed salts of NaCl and  $\text{CaCl}_2$ . To precipitate the  $\text{Ca}^{2+}$ ,  $\text{Na}_2\text{CO}_3$  was added converting  $\text{CaCl}_2$  to  $\text{CaCO}_3$ . The resultant  $\text{CaCO}_3$  precipitate was collected by filtration and drying to constant weight (about 1.69 g). By this way, the mass of salted-out NaCl was calculated by difference method (29.59 g). Therefore, the maximum desalination efficiency of NaCl at 100 °C was determined as 74.35%, which is in good agreement with the theoretical result (76.62%).

Table S2. The measured desalination efficiency of NaCl with the introduction of anhydrous CaCl<sub>2</sub>.

| Temperature (°C)                                                                                                                                    | 0     | 10    | 20    | 30     | 40     | 50     | 60     | 70     | 80     | 90     | 100    |
|-----------------------------------------------------------------------------------------------------------------------------------------------------|-------|-------|-------|--------|--------|--------|--------|--------|--------|--------|--------|
| Volume of H <sub>2</sub> O (mL)                                                                                                                     | 100   | 100   | 100   | 100    | 100    | 100    | 100    | 100    | 3100   | 100    | 100    |
| Introduced NaCl (g)                                                                                                                                 | 35.70 | 35.80 | 36.00 | 36.30  | 36.60  | 37.00  | 37.30  | 37.80  | 38.40  | 39.00  | 39.80  |
| Introduced CaCl <sub>2</sub> (g)                                                                                                                    | 59.50 | 64.70 | 74.50 | 100.00 | 128.00 | 132.00 | 137.00 | 143.00 | 147.00 | 154.00 | 159.00 |
| Mixture precipitation (g)                                                                                                                           | 14.16 | 17.87 | 18.92 | 25.64  | 27.98  | 29.37  | 26.57  | 29.84  | 29.56  | 30.19  | 31.47  |
| Mixture precipitation was dissolved again, and Na <sub>2</sub> CO <sub>3</sub> was introduced until no more CaCO <sub>3</sub> precipitation formed. |       |       |       |        |        |        |        |        |        |        |        |
| CaCO <sub>3</sub> precipitation (g)                                                                                                                 | 0.37  | 1.34  | 1.91  | 2.45   | 2.91   | 2.51   | 1.47   | 1.88   | 1.49   | 1.59   | 1.69   |
| Undissolved CaCl <sub>2</sub> (g)                                                                                                                   | 0.41  | 1.49  | 2.12  | 2.72   | 3.23   | 2.79   | 1.63   | 2.09   | 1.65   | 1.76   | 1.88   |
| Salted-out NaCl (g)                                                                                                                                 | 13.75 | 16.38 | 16.80 | 22.92  | 24.75  | 26.58  | 24.94  | 27.75  | 27.91  | 28.43  | 29.59  |
| Desalination efficiency (%)                                                                                                                         | 38.51 | 45.76 | 46.67 | 63.14  | 67.62  | 71.85  | 69.86  | 73.43  | 72.67  | 72.89  | 74.35  |

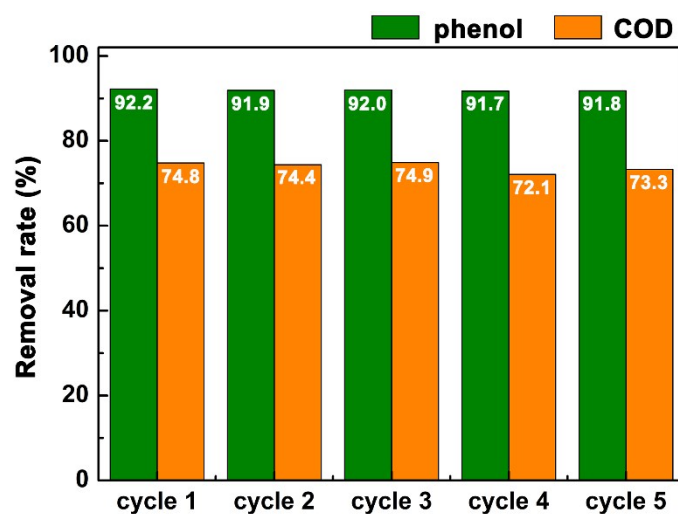

Figure S1. The removal rates of phenol and COD under the catalysis of  $\text{CeCl}_3$  catalyst in the recycle runs after reacting at  $150\text{ }^\circ\text{C}$  for 3 h in  $\text{CaCl}_2 \cdot 3\text{H}_2\text{O}$  medium. Reaction conditions: 0.01 mol of  $\text{CeCl}_3$  catalyst, 1.5 mol of  $\text{CaCl}_2$  and 80 mL of phenol solution ( $30\text{ g}\cdot\text{L}^{-1}$ )

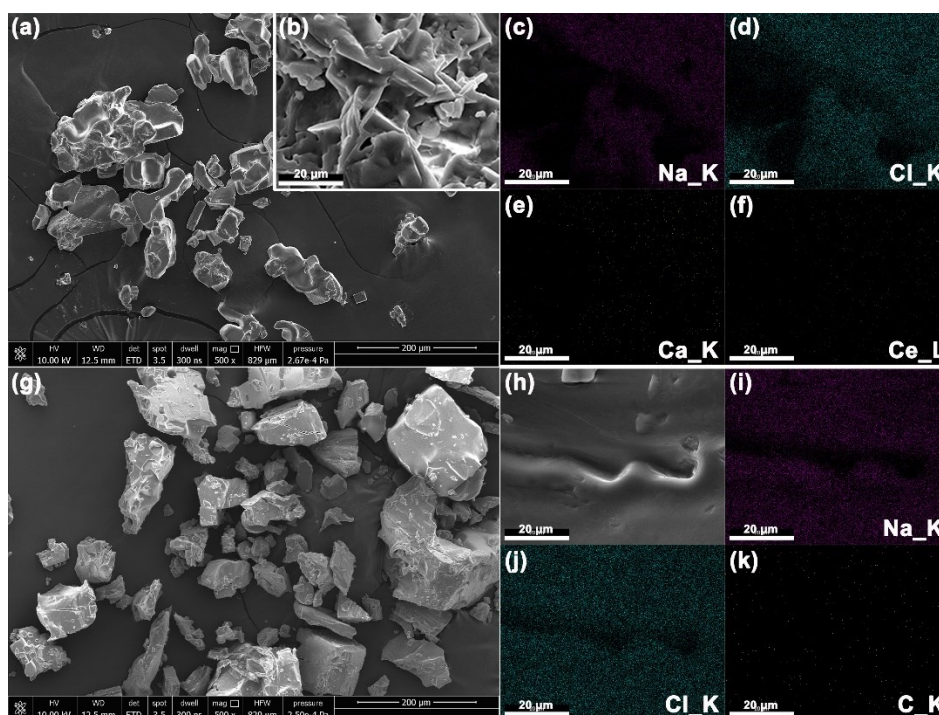

Figure S2. The SEM-Mapping images of (a~f) the NaCl obtained from direct evaporation of the wastewater to dry and (g~k) the NaCl salted-out from the wastewater owing to common-ion effect in continuous operation.
